1 **Establishment of a well-characterized SARS-CoV-2**  
2 **lentiviral pseudovirus neutralization assay using 293T cells**  
3 **with stable expression of ACE2 and TMPRSS2**

4 **Sabari Nath Neerukonda<sup>1</sup>, Russell Vassell<sup>1</sup>, Rachel Herrup<sup>1</sup>, Shufeng Liu<sup>1</sup>, Tony Wang<sup>1</sup>,**  
5 **Kazuyo Takeda<sup>2</sup>, Ye Yang<sup>3</sup>, Tsai-Lien Lin<sup>3</sup>, and Wei Wang<sup>1\*</sup>, Carol D. Weiss<sup>1\*</sup>**

6

7 <sup>1</sup> Office of Vaccine Research and Review, Center for Biologics Evaluation and Research and  
8 Review, US Food and Drug Administration, Silver Spring, Maryland, United States of America

9 <sup>2</sup> Office of Blood Research and Review, Center for Biologics Evaluation and Research and  
10 Review, US Food and Drug Administration, Silver Spring, Maryland, United States of America

11 <sup>3</sup> Office of Biostatistics and Epidemiology, Center for Biologics Evaluation and Research and  
12 Review, US Food and Drug Administration, Silver Spring, Maryland, United States of America

13

14 \* Corresponding authors:

15 Email: [wei.wang@fda.hhs.gov](mailto:wei.wang@fda.hhs.gov) (WW)

16 Email: [carol.weiss@fda.hhs.gov](mailto:carol.weiss@fda.hhs.gov) (CDW)

17

18 Short title: SARS-CoV-2 lentiviral pseudovirus neutralization in 293T-ACE2.TMPRSS2 cells

19 Keywords: SARS-CoV-2; pseudovirus; neutralization assay; ACE2; TMPRSS2; COVID-19;

20 neutralizing antibodies

21

## 22 **Abstract**

23 Pseudoviruses are useful surrogates for highly pathogenic viruses because of their safety, genetic  
24 stability, and scalability for screening assays. Many different pseudovirus platforms exist, each  
25 with different advantages and limitations. Here we report our efforts to optimize and characterize  
26 an HIV-based lentiviral pseudovirus assay for screening neutralizing antibodies for SARS-CoV-  
27 2 using a stable 293T cell line expressing human angiotensin converting enzyme 2 (ACE2) and  
28 transmembrane serine protease 2 (TMPRSS2). We assessed different target cells, established  
29 conditions that generate readouts over at least a two-log range, and confirmed consistent  
30 neutralization titers over a range of pseudovirus input. Using reference sera and plasma panels,  
31 we evaluated assay precision and showed that our neutralization titers correlate well with results  
32 reported in other assays. Overall, our lentiviral assay is relatively simple, scalable, and suitable  
33 for a variety of SARS-CoV-2 entry and neutralization screening assays.

## 34 **Introduction**

35 In December 2019 a cluster of atypical pneumonia cases appeared in Wuhan, China. The  
36 etiological agent was later identified as severe acute respiratory syndrome coronavirus 2 (SARS-  
37 CoV-2), the causative agent of coronavirus disease 2019 (COVID-19) (1-4). In the past year,  
38 SARS-CoV-2 spread as a global pandemic with more than 75 million cases and 1.6 million  
39 deaths (Source: Johns Hopkins Coronavirus Resource Center; <https://coronavirus.jhu.edu/>). A  
40 key priority in fighting the ongoing pandemic involves measuring immune responses to the spike  
41 (S) glycoprotein of SARS-CoV-2, a critical target for developing preventive vaccines (5) and  
42 antibody (Ab)-based therapeutics for COVID-19 patients (6, 7), including therapeutic  
43 monoclonal antibodies (mAbs) and convalescent plasma therapy (8-16).

44 Assessments of serological responses to the S glycoprotein typically include virus  
45 microneutralization (MN) assays or enzyme-linked immunosorbent assay (ELISA), and ELISA  
46 variants, such as lateral flow assay (LFA), chemiluminescence immunoassay (CLIA), and  
47 electrochemiluminescence immunoassay (ECLIA) (17-19). Replicating, wild-type (WT) SARS-  
48 CoV-2 MN assays remain the gold standard, but they are labor intensive due to the need for high  
49 biosafety level containment (BSL-3) handling by trained personnel and challenges for high  
50 throughput (20). On the other hand, ELISA formats are safe and high throughput, but they do not  
51 always measure titers that strongly correlate with neutralization titers measured in the WT MN  
52 assay (10, 18, 21-23). Neutralizing Abs are thought to be an important component of protection.  
53 Some Abs that bind to S in ELISAs do not neutralize virus because they bind to S epitopes that  
54 do not interfere with receptor binding or fusion steps needed for virus entry (24-26).

55 The trimeric S glycoprotein mediates virus entry by binding to the ACE2 receptor on target  
56 cells and catalyzing fusion between viral and target cell membranes. Proteolytic processing of S  
57 is required for its fusion competence. The multi-basic furin-like cleavage site (RRAR\*SV)  
58 allows S to be efficiently cleaved into the S1 subunit that contains the receptor binding domain  
59 (RBD) and the S2 subunit that contains domains needed for fusion (27-29). Efficient entry into  
60 the target cells additionally requires S protein priming at the S2' site by cellular proteases, such  
61 as TMPRSS2 or cathepsins B and L (Cat B or L) (28). Depending upon the cell type, cellular  
62 proteases promote entry at the cell surface (e.g., TMPRSS2 in lung epithelium and TMPRSS4 in  
63 gut enterocytes) or in endosomes (e.g., Cat L) (28, 30). Small molecules or other inhibitors that  
64 target the S protein fusion function or cellular proteases needed for S2' priming prevent the  
65 fusion step of entry (28). Neutralizing Abs directed against the top of the RBD typically compete  
66 with virus binding to ACE2, while those directed against the side surfaces of the RBD often do



67 not efficiently compete with ACE2 binding and may therefore show less potent neutralization  
68 (17).

69 Pseudoviruses bearing viral envelope proteins provide safe surrogates for highly pathogenic  
70 viruses in MN assays. Several groups have generated SARS-CoV-2 pseudoviruses with  
71 glycoprotein defective murine leukemia virus (MLV)-, human immunodeficiency virus (HIV)-,  
72 and vesicular stomatitis virus (VSV)-based systems and used them in neutralization assays based  
73 on fluorescence (monomeric neon green) or enzymatic activity (nano-, gaussia-, and firefly  
74 luciferases) read outs in a variety of target cell types (20, 24, 31-44). In the present study, we  
75 describe our optimized conditions for an HIV-based lentiviral SARS CoV-2 pseudovirus  
76 neutralization assay. To resemble respiratory cells with TMPRSS2 and facilitate assay  
77 procedures, we established a stable 293T cell line expressing both ACE2 and TMPRSS2. We  
78 present our detailed methodology and the performance characteristics of the assay, which should  
79 be suitable for many quantitative, high-throughput virus neutralization and entry screens that can  
80 be easily performed in a routine BSL-2 laboratory.

## 81 **Materials and methods**

### 82 **Ethics Statement**

83 Use of de-identified sera and plasma samples in this study was approved the US Food and Drug  
84 Administration Research in Human Subjects Committee.

### 85 **Plasmids, cell lines and inhibitors**

86 Full-length open reading frame of the S gene of SARS-COV2 Wuhan-Hu-1 isolate (Genbank  
87 accession: YP\_009724390.1) was synthesized by GenScript (Piscataway, NJ) and cloned into the

88 pCMV/R expression plasmid. Mutations in S were introduced using standard molecular biology  
89 protocols and confirmed by sequencing. The HIV gag/pol (pCMV $\Delta$ R8.2), pCMV/R, and  
90 Luciferase reporter (pHR'CMV-Luc) plasmids described previously (45, 46) were obtained from  
91 the Vaccine Research Center (National Institutes of Health (NIH), Bethesda, MD). pCAGGS-  
92 TMPRSS2 plasmid (47) was obtained from Dr. Mikhail Matrosovich (University of Marburg,  
93 Germany). pHAGE2-EF1aInt-TMPRSS2-IRES-mCherry plasmid was obtained from Dr. Jesse  
94 Bloom (Fred Hutchinson Cancer Center, Seattle, WA) (48). pCMV-VSV-G was obtained from  
95 Dr. Kathy Bouir, (University of California, San Diego). A plasmid encoding human ACE2  
96 (hACE2-TM) was obtained from the NIH Vaccine Research Center. HEK293T-ACE2  
97 (293T.ACE2<sub>s</sub>) cells stably expressing ACE2 were obtained through BEI Resources, National  
98 Institute of Allergy and Infectious Diseases, NIH; (NR-52511, contributed by Jesse Bloom, Fred  
99 Hutchinson Cancer Research Center, Seattle, WA) (32). The 293T, Vero, Vero E6, A549, Caco-  
100 2, Calu-3 and Huh-7 cells were maintained at 37°C in Dulbecco's modified eagle medium  
101 (DMEM) supplemented with high glucose, L-Glutamine, minimal essential media (MEM) non-  
102 essential amino acids, penicillin/streptomycin and 10% fetal bovine serum (FBS). Chemical  
103 inhibitors, camostat mesylate (TMPRSS2 inhibitor; Cat no: SML0057) and chloroquine  
104 (endosomal acidification inhibitor; Cat no: 50-63-5) were obtained from MilliporeSigma.

## 105 **Antibodies and sera**

106 Mouse mAb 10G6H5 against SARS-COV2 S protein was purchased from GenScript  
107 (Piscataway, NJ). Rabbit antisera against the S1 subunit, the receptor binding domain (RBD),  
108 and the S2 subunit of SARS-COV2 S protein (49) were provided by Surender Khurana (US Food  
109 and Drug Administration, Silver Spring, MD). The National Institute of Biological Standards and  
110 Control (NIBSC) serology reference panel, including 20/120, 20/122, 20/124, 20/126, 20/128

111 and 20/130, against SARS-COV-2 was provided by Giada Mattiuzzo (National Institute for  
112 Biological Standards and Control (NIBSC), Potters Bar, UK). Human plasma from COVID-19  
113 patients were provided by James Rost and Norton Elson (Washington Adventist Medical  
114 Healthcare), Nicholas Cacciabeve (Advanced Pathology Associates), and Rob San Luis, Hollie  
115 Genser, Demetra Collier, Meaza Belay, Genevieve Caoili, Zanetta E. Morrow, and Bruana  
116 Streets (Quest Diagnostics). A serum and plasma proficiency panel (focused concordance  
117 samples) with high, medium, and low neutralizing titers against SARS-COV-2 and a blinded  
118 serum and plasma panel developed for the SARS-CoV-2 neutralization assay concordance  
119 survey (SNACS) were provided by Dr. David Montefiori (Duke University, Durham, NC).  
120 Negative control sera collected in September-December of 2009 from 45 volunteers ages 48-64  
121 years was described previously (50). HIV-1 p24 hybridoma (183-H12-5C) was obtained through  
122 the AIDS Research and Reference Reagent Program, Division of AIDS, NIAID, NIH and  
123 contributed by Dr. Bruce Chesebro.

## 124 **Pseudovirus production and neutralization**

125 Pseudoviruses bearing the S glycoprotein and carrying a firefly luciferase (FLuc) reporter gene  
126 were produced in 293T cells. Briefly, 5 $\mu$ g of pCMV $\Delta$ R8.2, 5 $\mu$ g of pHR'CMVLuc and 0.5 $\mu$ g of S  
127 or its mutants (codon optimized) expression plasmids with or without 2 $\mu$ g of the TMPRSS2  
128 expression plasmid were co-transfected in 293T cells. Pseudovirus supernatants were collected  
129 approximately 48 h post-transfection, filtered through a 0.45 $\mu$ m low protein binding filter, and  
130 used immediately or stored at -80°C. Pseudovirus titers were measured by infecting different  
131 cells for 48 h prior to measuring luciferase activity (luciferase assay reagent, Promega, Madison,  
132 WI), as described previously (51). Pseudovirus titers were expressed as relative luminescence  
133 unit per milliliter of pseudovirus supernatants (RLU/ml).

134 Neutralization assays were performed on 293T cells transiently transfected or transduced  
135 with ACE2 and TMPRSS2 genes for stable expression. Briefly, pseudoviruses with titers of  
136 approximately  $10^6$  RLU/ml of luciferase activity were incubated with antibodies or sera for one  
137 hour at 37°C. Pseudovirus and antibody mixtures (100  $\mu$ l) were then inoculated onto 96-well  
138 plates that were seeded with  $3.0 \times 10^4$  cells/well one day prior to infection. Pseudovirus  
139 infectivity was scored 48 h later for luciferase activity. The antibody dilution or mAb  
140 concentration causing a 50% and 80% reduction of RLU compared to control (ID<sub>50</sub> and ID<sub>80</sub> or  
141 IC<sub>50</sub> and IC<sub>80</sub>, respectively) were reported as the neutralizing antibody titers. Titers were  
142 calculated using a nonlinear regression curve fit (GraphPad Prism software Inc., La Jolla, CA).  
143 The mean 50% and 80% reduction of RLU compared to control from at least two independent  
144 experiments was reported as the final titer. For experiments involving camostat mesylate (0.03-  
145 500  $\mu$ M) and chloroquine (0.39-25  $\mu$ M), target cells were treated with each inhibitor for two  
146 hours before pseudovirus infection in the presence of respective inhibitor.

## 147 **Generation of transient and stable 293T-ACE2.TMPRSS2 cells**

148 The 293T-ACE2.TMPRSS2<sub>i</sub> cells transiently expressing low, medium, and high levels of  
149 TMPRSS2 were generated by co-transfection of ACE2-TM and pCAGGS-TMPRSS2 plasmids  
150 in 2 $\mu$ g, 4 $\mu$ g and 8 $\mu$ g, respectively. Cell surface expression levels of ACE2 and TMPRSS2 were  
151 determined by flow cytometry. Briefly, transfected cells were harvested using non-enzymatic  
152 cell dissociation solution (Sigma-Aldrich) and resuspended in flow cytometry staining buffer  
153 (FCSB), PBS containing 2% FBS and 0.1% sodium azide, at  $10^7$  cells/ml. Cells were incubated  
154 in AF647-conjugated anti-ACE2 mAb (Santa Cruz: sc-390851) and/or AF488 conjugated anti-  
155 TMPRSS2 mAb (Santa Cruz: sc-515727), followed by three FCSB washes. Cells were then

156 fixed in 2% formaldehyde, washed with FCSB and quantified for signal intensity using a BD  
157 LSRFortessa-X20 flow cytometer (Becton Dickinson).

158 To generate stable 293T-ACE2.TMPRSS2<sub>s</sub> cells, VSV-G-pseudotyped lentiviruses carrying  
159 the human TMPRSS2 gene were generated by co-transfecting 293T cells with the pHAGE2-  
160 EF1aInt-TMPRSS2-IRES-mCherry, pCMVΔ8.2, and pCMV-VSV-G plasmids. Packaged  
161 lentivirus was used to transduce 293T-ACE2 cells in the presence of 10μg/mL polybrene, and  
162 the resulting bulk transduced population was single-cell sorted into clear bottomed 96 well plates  
163 by flow cytometry that was based on intermediate or high mCherry positivity on a BD  
164 FACS Aria II Cell Sorter. Once single cell clones reached confluence, they were screened for  
165 mCherry/TMPRSS2 expression via EVOS Flouid cell imaging station (Thermo Fisher, Waltham,  
166 MA), and several clones with visible mCherry expression were expanded. For verifying mCherry  
167 expression via flow cytometry, cells were harvested with enzyme-free cell dissociation buffer  
168 (Thermo Fisher, Waltham, MA), washed, and resuspended in FACS buffer. One clone that  
169 displayed intermediate levels of mCherry expression and maximum pseudovirus infectivity titer  
170 was selected and referred to as 293T-ACE2.TMPRSS2<sub>s</sub>. Up to the present, this clone has  
171 supported high-level infectivity of SARS-CoV-2 pseudoviruses through 20 passages.

## 172 **SARS-CoV-2 mNG infection and confocal microscopy**

173 Vero E6 cells, 293T-hACE2<sub>s</sub>, and 293T-ACE2.TMPRSS2<sub>s</sub> cells were seeded on poly-L-lysine-  
174 coated coverslips one day prior to infection. Infection with live SARS-CoV-2-mNG (MOI:0.1)  
175 was carried out in medium containing 2% FBS for one hour at 37°C, prior to washing the cells  
176 twice with PBS and then maintaining in culture, described above. SARS-CoV-2-mNG  
177 expressing mNeon Green (mNG) in place of ORF7 was described previously (52). At 24 h post

178 infection (p.i.) SARS-CoV-2-mNG-infected coverslips were fixed with 4% paraformaldehyde in  
179 PBS at room temperature for 20 min followed by PBS washes. SARS-CoV-2-mNG infection and  
180 fixing procedures were performed in a BSL-3 laboratory at the US Food and Drug  
181 Administration. Coverslips were counterstained with Hoechst 33258 dye (Thermo Scientific) and  
182 mounted on microscope slides with Fluoromount-G (SouthernBiotec). Confocal microscopy was  
183 performed by using SP8 DMI6000 confocal microscope (Leica Microsystems Inc, Germany)  
184 equipped with 25x water immersion objective lens and 405, 488 and 594 laser lines for Hoechst,  
185 mNG and mCherry signal, respectively.

## 186 **Immunoblot analysis**

187 Pseudoviruses were resolved by SDS-PAGE and detected by Western blot using a mouse mAb  
188 (183-H12-5C) against HIV-1 p24 Gag and rabbit antisera against the S1 subunit and the S2  
189 subunit of SARS-COV-2 S protein.

## 190 **Statistics analysis**

191 To evaluate assay precision, six NIBSC plasma standards, 15 focused concordance samples and  
192 21 SNACS samples were tested by three operators. Two operators ran four independent  
193 experiments (two independent experiments per operator), and a third operator ran one  
194 experiment. Titers were calculated from curves using eight dilutions. Intermediate precision,  
195 expressed as the percent coefficient of variation (%CV), was assessed separately for ID<sub>50</sub> and  
196 ID<sub>80</sub> titers. Sample dilutions with observed titers of less than 1:40 were considered as negative  
197 for antibodies to SARS-CoV-2 and were imputed a value of 1:20. An exploratory analysis was  
198 additionally performed by excluding titers of less than 1:40. Samples with more than 50% of less  
199 than 1:40 were excluded from all analyses. The total %CV accounts for both inter-operator and

200 inter-assay variability and were estimated as follows based on a linear mixed model of the  
201 natural log-transformed titers with sample as a fixed effect and operator as a random effect:

$$202 \quad \%CV = \sqrt{e^{\hat{\sigma}_{OP}^2 + \hat{\sigma}_{IS}^2} - 1} \times 100$$

203 where  $\hat{\sigma}_{OP}^2$  and  $\hat{\sigma}_{IS}^2$  were the estimated inter-operator and inter-assay (within-operator) variance  
204 components from the model, respectively. *SAS version 9.4* was used to perform the linear mixed  
205 model analysis.

206

207 To evaluate accuracy, since the true titers of test samples are not known, the Spearman  
208 correlation coefficient between the reported titers and the “observed” titers was estimated with  
209 GraphPad Prism software.

210

## 211 **Results and discussion**

### 212 **Selection of optimal target cells for SARS-CoV-2 pseudovirus** 213 **infectivity**

214 We generated SARS-CoV-2 pseudoviruses bearing full-length S glycoprotein from the SARS-  
215 COV-2 Wuhan-Hu-1 isolate using a second-generation lentiviral packaging system that we used  
216 previously for producing pseudoviruses bearing other viral glycoproteins (51, 53, 54). We  
217 assessed SARS-CoV-2 pseudoviruses for infectivity in target cell types that were previously  
218 reported to support various levels of pseudovirus and replicating virus infectivity. A previous

219 study reported higher infectivity of VSV-based pseudoviruses in Huh7, 293T, and Vero cells  
220 compared to CHO, MDCK, and HepG2 cells (39), but other studies reported poor or no  
221 infectivity of 293T cells due to the absence of ACE2 receptor (33, 43). Other cell types,  
222 including stably engineered cells (293T, 293T17, HT1080, BHK21), transiently transfected cells  
223 (293T, Caco-2, Huh7, HepG2, MDCK), and various continuous cell lines (Vero-E6, A549,  
224 BEAS2B, Calu-3, H1299, MRC5, Caco-2, HeLa, K562) that express ACE2, TMPRSS2, or both,  
225 have been widely reported to support pseudovirus infectivity to different degrees (20, 24, 31-44).  
226 We therefore assessed a panel of cell types, including Vero, Vero E6, A549, Caco-2, Calu-3,  
227 Huh7, 293T, and 293T cells transiently expressing ACE2 (293T-ACE2<sub>t</sub>), TMPRSS2 (293T-  
228 TMPRSS2<sub>t</sub>), or both (293T-ACE2.TMPRSS2<sub>t</sub>), to identify the cells that supported the highest  
229 levels of infectivity for our pseudoviruses.

230 As expected, our SARS-CoV-2 pseudoviruses lacked infectivity above background levels  
231 (approximately 10<sup>4</sup> RLU/ml) in 293T cells due to the absence of the ACE2 receptor, while Vero-  
232 E6 cells are naturally resistant to human lentivirus infection due to intrinsic restriction factors  
233 (Fig 1A). The A549, Caco-2, Calu-3, and Huh-7 cells also lacked infectivity above background  
234 levels (Fig 1A). Transient 293T-TMPRSS2<sub>t</sub> or 293T-ACE2<sub>t</sub> cells had 5.7- and 40-fold signal  
235 above background, respectively, while transient 293T-ACE2.TMPRSS2<sub>t</sub> cells resulted in a 3130-  
236 fold signal above background (Fig 1A). A stable 293T-ACE2<sub>s</sub> cell line displayed 144-fold higher  
237 signal compared to background (Fig 1A).

238 A prior report demonstrated priming of SARS-CoV-2 S in VSV-based pseudoviruses by  
239 TMPRSS2-related proteases TMPRSS11D, 11E, 11F, and 13 in Calu-3 target cells. Of the  
240 TMPRSS2-related proteases, TMPRSS13 was as efficient as TMPRSS2, while the others were  
241 less efficient in promoting S priming and thus infectivity (41). In the present study, we



242 investigated the ability of TMPRSS11D (also known as human airway trypsin) in target 293T  
243 cells transiently expressing ACE2 and TMPRSS11D (293T-ACE2.TMPRSS11D<sub>t</sub>). Consistent  
244 with the prior report, TMPRSS11D was less efficient in S priming, as reflected by an 11-fold  
245 lower infectivity in 293T-ACE2.TMPRSS11D<sub>t</sub> cells compared to 293T-ACE2.TMPRSS2<sub>t</sub> cells  
246 (Fig 1A).

247 To facilitate SARS-CoV-2 pseudovirus neutralization assays and partly mimic natural SARS-  
248 CoV-2 target cells that express TMPRSS2, we established a stable cell line expressing both  
249 ACE2 and TMPRSS2 (293T-ACE2.TMPRSS2<sub>s</sub>) by transducing the 293T-ACE2 cells with a  
250 lentivirus encoding TMPRSS2 and mCherry as a bicistronic transcript. The ACE2.TMPRSS2<sub>s</sub>  
251 cells conferred infectivity approximately 1700-fold above background, confirming the  
252 contribution of TMPRSS2 protease activity for priming the S protein for fusion competence.  
253 Because the ACE2.TMPRSS2<sub>s</sub> cells facilitated greater levels of infectivity and provided  $> 10^8$   
254 RLU/ml infectivity ( $>3$  log range) for resolving titers, we focused on qualifying the 293T-  
255 ACE2.TMPRSS2<sub>s</sub> cells for our future studies. We also confirmed S protein incorporation into  
256 pseudoviruses and proteolytic processing of the S protein to generate S1 and S2 subunits that  
257 migrate at 130kDa and 90kDa, respectively (Fig 1B).

## 258 **Optimization of SARS-CoV-2 pseudovirus infectivity**

259 We investigated several conditions for optimizing SARS-CoV-2 pseudovirus production in 293T  
260 cells. When comparing S priming by TMPRSS2 during pseudovirus production to priming  
261 during entry into target cells, we found that co-expressing TMPRSS2 during pseudovirus  
262 production reduced pseudovirus infectivity, possibly due to TMPRSS2-induced premature  
263 activation of S that promotes conformational changes to fusion-incompetent or post-fusion

264 structures (Fig 1C). This finding is consistent with a previous report suggesting the importance  
265 of tight regulation of protease cleavage of the S protein for preserving SARS-CoV-2 infectivity  
266 (55).

267 We also investigated variant S proteins to further optimize pseudovirus production. We  
268 generated S genes with the D614G mutation or a C-terminal cytoplasmic tail truncation of 19  
269 amino acids (TR19) that were previously reported to yield higher infectivity titers compared to  
270 full length WT S glycoprotein (34, 38, 39, 42, 56). The D614G change represents a natural  
271 mutation outside RBD that became dominant in the circulating strains (39). In 293T-ACE2<sub>s</sub>  
272 cells, the D614G mutation was reported to confer 1-log or >1/2-log higher infectivity to VSV-  
273 based or lentivirus-based S pseudoviruses, respectively (38, 39, 57). Furthermore, viruses with  
274 the G614 S were associated with higher virion stability and increased *in vitro* SARS-CoV-2  
275 replication fitness in primary human airway epithelial cells and Calu-3 cells (57). Increased  
276 infectivity conferred by the D614G change is due to removal of hydrogen-bond interaction with  
277 T859 from a neighboring protomer of the S trimer. This results in an allosteric change of RDB  
278 domain to an “up” conformation that facilitates ACE2 receptor binding that may make the virus  
279 modestly more susceptible to neutralization by some sera or antibodies, depending the epitopes  
280 targeted by the antibodies (39, 56, 57). Truncation of C-terminal 18 or 19 amino acids, which  
281 removes a putative ER retention signal, was also demonstrated to enhance HIV-based  
282 pseudotyping efficiency by 10-fold compared to WT S protein in 293T-ACE2<sub>s</sub> cells (42, 58).  
283 The higher infectivity conferred by the C-terminal cytoplasmic tail truncation of 19 amino acids  
284 may be due to higher number of infectious particles (42).

285 Consistent with previous reports, we found that pseudoviruses bearing G614 and TR19 S  
286 proteins displayed 0.5- and 0.2-log higher infectivity, respectively, compared to WT pseudovirus

287 in 293T-ACE2<sub>s</sub> cells (Fig 1D). Pseudoviruses with TR14 S had slightly lower infectivity  
288 compared to WT pseudoviruses (Fig 1D). However, in 293T-ACE2.TMPRSS2<sub>s</sub> cells the  
289 pseudovirus bearing the G614 S and TR19 S were more similar to WT S pseudoviruses, but the  
290 pseudovirus bearing the TR14 S displayed 0.5 log lower infectivity compared to WT pseudovirus  
291 (Fig 1D). Infectivity titers of all pseudoviruses were 1-1.5-log lower on 293T-ACE2<sub>s</sub> cells  
292 compared to 293T-ACE2.TMPRSS2<sub>s</sub> cells (Fig 1D). Based on these studies, we used WT S to  
293 qualify our pseudovirus neutralization assay because it represents the native, full-length spike,  
294 and the infectivity of WT S pseudoviruses give a large dynamic range for generating  
295 neutralization dose-response curves. Additional efforts to enhance pseudovirus infectivity with  
296 polybrene, a polycation that is known to enhance lentiviral transduction efficiency by  
297 minimizing charge-repulsion between the virus and cells, displayed no effect on pseudovirus  
298 infectivity.

## 299 **Replication of SARS-CoV-2-mNG in 293T-ACE2.TMPRSS2<sub>s</sub> cells**

300 We confirmed the acceptability of the 293T-ACE2.TMPRSS2<sub>s</sub> cells for SARS-CoV-2 infectivity  
301 and neutralization studies by assessing how well the cells support infection by replicating SARS-  
302 CoV-2. We compared replication levels and cytopathic effects (CPE) in 293T-ACE2.TMPRSS2<sub>s</sub>  
303 to Vero E6 cells that are widely used for the propagation of SARS-CoV-2, as well as to 293T-  
304 ACE<sub>s</sub> cells that lack TMPRSS2. Typically, SARS-CoV-2-induces CPE in Vero cells by 48-72 h  
305 post infection (p.i.), characterized by cell rounding, detachment, degeneration, and syncytia (59).  
306 However, by 24 h p.i., when both SARS-CoV-2-infected Vero E6 and 293T-ACE2<sub>s</sub> cells began  
307 to display mNG expression and early CPE, SARS-CoV-2-infected 293T-ACE2.TMPRSS2<sub>s</sub> cells  
308 displayed robust mNG expression and higher levels of CPE with nearly 50% of infected  
309 monolayer undergoing detachment (Fig 2). The rapid kinetics of infection is consistent with a

310 preprint indicating co-expression of ACE2 and TMPRSS2 synergistically increases SARS-CoV-  
311 2 or pseudovirus entry efficiency (40).

## 312 **Entry pathways of SARS-CoV-2 pseudoviruses**

313 Next, we used chemical inhibitors to determine the protease that primes SARS-CoV-2 S protein  
314 for membrane fusion during pseudovirus entry in 293T-ACE2.TMPRSS2<sub>s</sub> cells. SARS-CoV-2  
315 can use pH-dependent and -independent pathways for cell entry (60). In cells lacking TMPRSS2,  
316 SARS-CoV-2 relies on endosomal-pH-dependent cysteine protease, such as cathepsin L for S  
317 priming, while entry is predominantly dependent on priming by TMPRSS2 in natural airway  
318 cells, such as lung epithelial cells, type II pneumocytes (60, 61). We found that pseudovirus  
319 entry into 293T-ACE2<sub>s</sub> cells, which lack TMPRSS2, was sensitive to the endosomal pH  
320 acidification inhibitor chloroquine, with a half maximal inhibitory concentration [IC<sub>50</sub>] of  
321 0.79μM, but relatively insensitive to a TMPRSS2 inhibitor camostat mesylate. In contrast,  
322 pseudovirus entry was sensitive to camostat mesylate [IC<sub>50</sub>: 0.88μM] in 293T-ACE2.TMPRSS2<sub>s</sub>  
323 cells, but much less so to chloroquine treatment (Fig 3). Thus, SARS-CoV-2 predominantly uses  
324 TMPRSS2 for priming S during virus entry into the 293T-ACE2.TMPRSS2<sub>s</sub> cells.

## 325 **Optimization of SARS-CoV-2 pseudovirus inoculum for** 326 **neutralization assays**

327 We next determined the inoculum range that would assure consistent neutralization titers  
328 according to the law of mass action (62). Serial dilutions of rabbit serum or mAb (10G6H5) were  
329 mixed with four different pseudovirus inoculums over a three-log range, prior to incubation with  
330 293T-ACE2.TMPRSS2<sub>s</sub> cells (Fig 4). Although 100% neutralization was achieved at high serum

331 or mAb concentrations using a relatively low inoculum of  $2 \times 10^4$  relative luciferase units/ml  
332 (RLU/ml), the dose-response curve displayed high variation at higher dilutions, precluding  
333 generation of a reliable curve for calculating 50% neutralization titers (Fig 4A and B). However,  
334 inoculums in the  $4 \times 10^5 - 1.4 \times 10^7$  RLU/ml range generated overlapping curves with little  
335 variation (Fig 4C and D). These dose-response curves yielded 50% neutralization titers with  
336 serum inhibitory dilution ( $ID_{50}$ ) and mAb inhibitory concentration ( $IC_{50}$ ) values that varied less  
337 than 2-fold over all pseudovirus inoculums. Therefore, inoculums of  $5 \times 10^5 - 1 \times 10^7$  RLU/ml  
338 were used for the neutralization assay.

### 339 **Assessment of the influence of ACE and TMPRSS2 levels on** 340 **neutralization titers**

341 Because the 293T-ACE2.TMPRSS2<sub>s</sub> cells may have higher levels of TMPRSS2, ACE2, or both,  
342 compared to some primary airway cells, we explored whether different levels of ACE2 and  
343 TMPRSS2 on target cells might influence neutralization titers. We transiently transfected 293T  
344 cells with ACE2 and TMPRSS2 to achieve low, medium, and high levels of ACE2 and  
345 TMPRSS2. Expression levels of ACE2 and TMPRSS2 were confirmed via flow cytometry (Fig  
346 5). Transfection of a higher plasmid concentration of ACE2 and TMPRSS2 resulted in an  
347 increase in the number of ACE2<sup>+</sup>/TMPRSS2<sup>+</sup> cells (Fig 5A) as well as cell surface expression  
348 (Fig 5B and 5C). Neutralization assays performed with rabbit sera against RBD or S1 subunit,  
349 murine mAb 10G6H5, as well as an NIBSC reference plasma (#20/130), showed no significant  
350 differences in neutralization titers among the target cells with different levels of ACE2 and  
351 TMPRSS2 (Table 1). Neutralization  $ID_{50}$  titers of rabbit sera against RBD and S1 subunit ranged  
352 from 9377 to 10540 and 5462 to 6742, respectively. NIBSC reference plasma  $ID_{50}$  titers ranged

353 from 2355 to 3130, while negative control sera lacked neutralization activity. IC<sub>50</sub> values for the  
 354 mAb 10G6H5 ranged from 0.119 to 0.197 μg/ml. The 80% neutralization titers (ID<sub>80</sub> or IC<sub>80</sub>) were  
 355 also similar among target cells with different levels of ACE2 or TMPRSS2. These findings  
 356 indicate that levels of ACE2 and TMPRSS2 may not have a significant impact on neutralization  
 357 titers for many antibodies.

358 **Table 1: Neutralization titers in 293T cells with low, medium, and high levels of ACE2 and**  
 359 **TMPRSS2**

| Target cells<br>(level)                         | Neutralization titer IC <sub>50</sub> or ID <sub>50</sub> (SD) |                   |                 |                   |     | Neutralization titer IC <sub>80</sub> or ID <sub>80</sub> (SD) |                       |                 |                   |     |
|-------------------------------------------------|----------------------------------------------------------------|-------------------|-----------------|-------------------|-----|----------------------------------------------------------------|-----------------------|-----------------|-------------------|-----|
|                                                 | Rabbit<br>anti-<br>RBD                                         | Rabbit<br>anti-S1 | NIBSC<br>plasma | 10G6H5<br>(μg/ml) | NHS | Rabbit<br>anti-<br>RBD                                         | Rabbit<br>anti-<br>S1 | NIBSC<br>plasma | 10G6H5<br>(μg/ml) | NHS |
| 293T-<br>ACE2 <sub>s</sub>                      | 9377<br>(16)                                                   | 6742<br>(2765)    | 3008<br>(651)   | 0.119<br>(0.025)  | <40 | 3065<br>(22)                                                   | 2053<br>(668)         | 789<br>(96)     | 0.467<br>(0.079)  | <40 |
| 293T-<br>ACE2.<br>TMPRSS2 <sub>t</sub><br>(low) | 9527<br>(87)                                                   | 5663<br>(1302)    | 3130<br>(601)   | 0.166<br>(0.051)  | <40 | 2915<br>(92)                                                   | 1928<br>(179)         | 737<br>(93)     | 0.478<br>(0.153)  | <40 |
| 293T-<br>ACE2.<br>TMPRSS2 <sub>t</sub><br>(med) | 9542<br>(636)                                                  | 5462<br>(765)     | 2893<br>(641)   | 0.197<br>(0.038)  | <40 | 2903<br>(71)                                                   | 1936<br>(135)         | 708<br>(74)     | 0.557<br>(0.111)  | <40 |
| 293T-<br>ACE2.                                  | 10540<br>(1508)                                                | 6652<br>(1649)    | 2355<br>(926)   | 0.163<br>(0.051)  | <40 | 3271<br>(55)                                                   | 2339<br>(515)         | 636<br>(257)    | 0.590<br>(0.112)  | <40 |

TMPRSS2<sub>t</sub>

(high)

---

360 NHS: Negative control human sera, SD: standard deviation

## 361 **Assessment of neutralization specificity and range of antibody titers**

362 We assessed assay specificity and range of antibody titers using sera with reported neutralization  
363 titers, as well as 15 plasma samples from patients hospitalized with COVID-19. Thirty sera  
364 collected before 2019 served as negative controls, along with a negative control reference plasma  
365 standard (NIBSC #20/126) (Fig 6). Positive controls included the focused concordance samples  
366 comprising four high, five medium, and five low neutralizing antibody titers. All negative  
367 control sera failed to neutralize SARS-CoV-2 pseudoviruses at the lowest dilution tested (1:40).  
368 Neutralization titers (ID<sub>50</sub> and ID<sub>80</sub>) segregated into high, medium, and low groupings, consistent  
369 with reported titers (Fig 6A and 6B). Plasma for patients hospitalized with acute COVID-19  
370 showed a wide range of titers, consistent with previous reports (63). We note, however, that the  
371 presence of reverse transcriptase or integrase inhibitors in sera or plasma samples from persons  
372 on anti-retroviral therapy (ART) has the potential to interfere with lentiviral pseudovirus readout  
373 that is dependent on reverse transcription and integration of the reporter gene. We therefore use  
374 lentiviral pseudoviruses bearing an envelope protein from amphotropic MLV or VSV as an  
375 additional control when assessing clinical samples that could include subjects on therapeutic or  
376 preventive ART. Non-specific inhibition of MLV- or VSV-pseudoviruses identifies sera that  
377 cannot be evaluated using this assay.

## 378 **Assessment of assay precision**

379 To further qualify the assay performance, we assessed intermediate precision among three  
380 operators using blinded test samples that included the six NIBSC plasma standards, 15 sera  
381 samples from the focused concordance samples panel, and a blinded panel of 21 sera samples  
382 that was used in a survey to assess assay concordance among labs using various SARS-CoV-2  
383 neutralization assays ([https://dhvi.duke.edu/duke-team-implement-sars-cov-2-neutralization-](https://dhvi.duke.edu/duke-team-implement-sars-cov-2-neutralization-assay-concordance-survey-laboratories-worldwide)  
384 [assay-concordance-survey-laboratories-worldwide](https://dhvi.duke.edu/duke-team-implement-sars-cov-2-neutralization-assay-concordance-survey-laboratories-worldwide)). Neutralization titers giving 50% or 80%  
385 inhibition (ID<sub>50</sub> and ID<sub>80</sub>, respectively) compared to control were used to calculate the %CV.  
386 Only positive samples (with at least 50% of titer results  $\geq 1:40$ ) were included in the precision  
387 calculation, which excluded six samples for ID<sub>50</sub> and 13 samples for ID<sub>80</sub>. The overall %CV  
388 across all samples for ID<sub>50</sub> and ID<sub>80</sub> titers was 38.8% and 30.8%, respectively, when titers  $< 1:40$   
389 were imputed to be 1:20. We consider these results to be acceptable for a neutralization assay  
390 and adequate for most clinical studies. When titers  $< 1:40$  were excluded from the analysis, the  
391 %CV was 27.5% and 20.7%, respectively.

## 392 **Assessment of inter-laboratory agreement**

393 We used the samples with reported neutralization titers as a benchmark for assessing accuracy of  
394 our assay. Although the reported titers were generated using different neutralization assay  
395 formats, we nevertheless found a strong correlation between our titers and the neutralization  
396 titers reported for the focused concordance samples (Fig 7A and B) and several NIBSC reference  
397 standards (Fig 7C and D). These results provide assurance that our assay provides titers that  
398 correlate well with titers measured in other assay formats.

## 399 **Conclusion**



400 We describe optimized procedures and detailed performance characteristics of an HIV-based,  
401 lentiviral pseudovirus neutralization assay for SARS-CoV-2 using a stable 293T cell line  
402 expressing ACE2 and TMPRSS2. The assay is quantitative, has a large dynamic range, and  
403 generates titers that correlate well with titers generated in other assays. The safety and relative  
404 simplicity of the assay makes it a valuable and versatile tool for evaluating mAb potency and  
405 neutralizing antibody titers in a BSL-2 lab setting.

## 406 **Acknowledgments**

407 We thank the following for generously contributing materials for this study: Dr. David  
408 Montefiori (Duke University), the HIV Vaccine Trials Network, and the HIV Prevention Trials  
409 Network for the focused concordance samples; Dr. Michael Busch (Vitalant Research Institute)  
410 for the SNACS samples; Jesse Bloom and Katharine H. D. Crawford (Fred Hutchinson Cancer  
411 Center) for the 293T-ACE2 cells and plasmids. We also thank Dr. Carolyn A. Wilson (US Food  
412 and Drug Administration) for facilitating receipt of plasma samples from subjects hospitalized  
413 for COVID-19 and Drs. Konstantin Virnik and Ira Berkower (US Food and Drug  
414 Administration) for critical reading of the manuscript.

## 415 **References**

- 416 1. Zhou P, Yang XL, Wang XG, Hu B, Zhang L, Zhang W, et al. A pneumonia outbreak  
417 associated with a new coronavirus of probable bat origin. *Nature*. 2020;579(7798):270-3.
- 418 2. Gorbalenya AE, Baker SC, Baric RS, de Groot RJ, Drosten C, Gulyaeva AA, et al. The  
419 species Severe acute respiratory syndrome-related coronavirus: classifying 2019-nCoV and  
420 naming it SARS-CoV-2. *Nature Microbiology*. 2020;5(4):536-44.

- 421 3. Wu F, Zhao S, Yu B, Chen Y-M, Wang W, Song Z-G, et al. A new coronavirus  
422 associated with human respiratory disease in China. *Nature*. 2020;579(7798):265-9.
- 423 4. Zhu N, Zhang D, Wang W, Li X, Yang B, Song J, et al. A Novel Coronavirus from  
424 Patients with Pneumonia in China, 2019. *New England Journal of Medicine*. 2020;382(8):727-  
425 33.
- 426 5. Poland GA, Ovsyannikova IG, Crooke SN, Kennedy RB. SARS-CoV-2 Vaccine  
427 Development: Current Status. *Mayo Clinic Proceedings*. 2020;95(10):2172-88.
- 428 6. Noy-Porat T, Makdasi E, Alcalay R, Mechaly A, Levy Y, Bercovich-Kinori A, et al. A  
429 panel of human neutralizing mAbs targeting SARS-CoV-2 spike at multiple epitopes. *Nature*  
430 *Communications*. 2020;11(1):4303.
- 431 7. Liu L, Wang P, Nair MS, Yu J, Rapp M, Wang Q, et al. Potent neutralizing antibodies  
432 against multiple epitopes on SARS-CoV-2 spike. *Nature*. 2020;584(7821):450-6.
- 433 8. Duan K, Liu B, Li C, Zhang H, Yu T, Qu J, et al. Effectiveness of convalescent plasma  
434 therapy in severe COVID-19 patients. *Proceedings of the National Academy of Sciences*.  
435 2020:202004168.
- 436 9. Shen C, Wang Z, Zhao F, Yang Y, Li J, Yuan J, et al. Treatment of 5 Critically Ill  
437 Patients With COVID-19 With Convalescent Plasma. *JAMA*. 2020;323(16):1582-9.
- 438 10. Manenti A, Maggetti M, Casa E, Martinuzzi D, Torelli A, Trombetta CM, et al.  
439 Evaluation of SARS-CoV-2 neutralizing antibodies using a CPE-based colorimetric live virus  
440 micro-neutralization assay in human serum samples. *Journal of Medical Virology*.  
441 2020;92(10):2096-104.

- 442 11. Joyner MJ, Wright RS, Fairweather D, Senefeld JW, Bruno KA, Klassen SA, et al. Early  
443 safety indicators of COVID-19 convalescent plasma in 5000 patients. *J Clin Invest.*  
444 2020;130(9):4791-7.
- 445 12. Joyner MJ, Klassen SA, Senefeld J, Johnson PW, Carter RE, Wiggins CC, et al. Evidence  
446 favouring the efficacy of convalescent plasma for COVID-19 therapy. *medRxiv.*  
447 2020:2020.07.29.20162917.
- 448 13. Hartman W, Hess AS, Connor JP. Hospitalized COVID-19 patients treated with  
449 Convalescent Plasma in a mid-size city in the midwest. *medRxiv.* 2020:2020.06.19.20135830.
- 450 14. Jin C, Gu J, Yuan Y, Long Q, Zhang Q, Zhou H, et al. Treatment of Six COVID-19  
451 Patients with Convalescent Plasma. *medRxiv.* 2020:2020.05.21.20109512.
- 452 15. Rasheed AM, Ftak DF, Hashim HA, Maulood MF, Kabah KK, Almusawi YA, et al. The  
453 therapeutic effectiveness of Convalescent plasma therapy on treating COVID-19 patients  
454 residing in respiratory care units in hospitals in Baghdad, Iraq. *medRxiv.*  
455 2020:2020.06.24.20121905.
- 456 16. Gharbharan A, Jordans CCE, GeurtsvanKessel C, den Hollander JG, Karim F, Mollema  
457 FPN, et al. Convalescent Plasma for COVID-19. A randomized clinical trial. *medRxiv.*  
458 2020:2020.07.01.20139857.
- 459 17. Amanat F, Stadlbauer D, Strohmeier S, Nguyen THO, Chromikova V, McMahon M, et  
460 al. A serological assay to detect SARS-CoV-2 seroconversion in humans. *Nat Med.*  
461 2020;26(7):1033-6.
- 462 18. Caruana G, Croxatto A, Coste AT, Opota O, Lamoth F, Jatton K, et al. Diagnostic  
463 strategies for SARS-CoV-2 infection and interpretation of microbiological results. *Clin*  
464 *Microbiol Infect.* 2020.

- 465 19. Liu W, Liu L, Kou G, Zheng Y, Ding Y, Ni W, et al. Evaluation of Nucleocapsid and  
466 Spike Protein-Based Enzyme-Linked Immunosorbent Assays for Detecting Antibodies against  
467 SARS-CoV-2. *J Clin Microbiol.* 2020;58(6).
- 468 20. Zettl F, Meister TL, Vollmer T, Fischer B, Steinmann J, Krawczyk A, et al. Rapid  
469 Quantification of SARS-CoV-2-Neutralizing Antibodies Using Propagation-Defective Vesicular  
470 Stomatitis Virus Pseudotypes. *Vaccines (Basel).* 2020;8(3).
- 471 21. Perera RA, Mok CK, Tsang OT, Lv H, Ko RL, Wu NC, et al. Serological assays for  
472 severe acute respiratory syndrome coronavirus 2 (SARS-CoV-2), March 2020. *Eurosurveillance.*  
473 2020;25(16):2000421.
- 474 22. Bohn MK, Lippi G, Horvath A, Sethi S, Koch D, Ferrari M, et al. Molecular, serological,  
475 and biochemical diagnosis and monitoring of COVID-19: IFCC taskforce evaluation of the latest  
476 evidence. *Clinical Chemistry and Laboratory Medicine (CCLM).* 2020;58(7):1037.
- 477 23. Özçürümez MK, Ambrosch A, Frey O, Haselmann V, Holdenrieder S, Kiehntopf M, et  
478 al. SARS-CoV-2 antibody testing—questions to be asked. *Journal of Allergy and Clinical*  
479 *Immunology.* 2020;146(1):35-43.
- 480 24. Rogers TF, Zhao F, Huang D, Beutler N, Burns A, He W-t, et al. Isolation of potent  
481 SARS-CoV-2 neutralizing antibodies and protection from disease in a small animal model.  
482 *Science.* 2020;369(6506):956-63.
- 483 25. Seydoux E, Homad LJ, MacCamy AJ, Parks KR, Hurlburt NK, Jennewein MF, et al.  
484 Analysis of a SARS-CoV-2-Infected Individual Reveals Development of Potent Neutralizing  
485 Antibodies with Limited Somatic Mutation. *Immunity.* 2020;53(1):98-105.e5.

- 486 26. Wec AZ, Wrapp D, Herbert AS, Maurer DP, Haslwanter D, Sakharkar M, et al. Broad  
487 neutralization of SARS-related viruses by human monoclonal antibodies. *Science*.  
488 2020;369(6504):731-6.
- 489 27. Coutard B, Valle C, de Lamballerie X, Canard B, Seidah NG, Decroly E. The spike  
490 glycoprotein of the new coronavirus 2019-nCoV contains a furin-like cleavage site absent in  
491 CoV of the same clade. *Antiviral Research*. 2020;176:104742.
- 492 28. Hoffmann M, Kleine-Weber H, Schroeder S, Kruger N, Herrler T, Erichsen S, et al.  
493 SARS-CoV-2 Cell Entry Depends on ACE2 and TMPRSS2 and Is Blocked by a Clinically  
494 Proven Protease Inhibitor. *Cell*. 2020;181(2):271-80 e8.
- 495 29. Wrapp D, Wang N, Corbett KS, Goldsmith JA, Hsieh C-L, Abiona O, et al. Cryo-EM  
496 Structure of the 2019-nCoV Spike in the Prefusion Conformation. *bioRxiv*.  
497 2020:2020.02.11.944462.
- 498 30. Zang R, Castro MFG, McCune BT, Zeng Q, Rothlauf PW, Sonnek NM, et al. TMPRSS2  
499 and TMPRSS4 promote SARS-CoV-2 infection of human small intestinal enterocytes. *Science*  
500 *Immunology*. 2020;5(47):eabc3582.
- 501 31. Chen X, Li R, Pan Z, Qian C, Yang Y, You R, et al. Human monoclonal antibodies block  
502 the binding of SARS-CoV-2 spike protein to angiotensin converting enzyme 2 receptor. *Cell Mol*  
503 *Immunol*. 2020;17(6):647-9.
- 504 32. Crawford KHD, Eguia R, Dingens AS, Loes AN, Malone KD, Wolf CR, et al. Protocol  
505 and Reagents for Pseudotyping Lentiviral Particles with SARS-CoV-2 Spike Protein for  
506 Neutralization Assays. *Viruses*. 2020;12(5).

- 507 33. Hyseni I, Molesti E, Benincasa L, Piu P, Casa E, Temperton NJ, et al. Characterisation of  
508 SARS-CoV-2 Lentiviral Pseudotypes and Correlation between Pseudotype-Based Neutralisation  
509 Assays and Live Virus-Based Micro Neutralisation Assays. *Viruses*. 2020;12(9).
- 510 34. Johnson MC, Lyddon TD, Suarez R, Salcedo B, LePique M, Graham M, et al. Optimized  
511 Pseudotyping Conditions for the SARS-COV-2 Spike Glycoprotein. *J Virol*. 2020;94(21).
- 512 35. Lei C, Qian K, Li T, Zhang S, Fu W, Ding M, et al. Neutralization of SARS-CoV-2 spike  
513 pseudotyped virus by recombinant ACE2-Ig. *Nat Commun*. 2020;11(1):2070.
- 514 36. Letko M, Marzi A, Munster V. Functional assessment of cell entry and receptor usage for  
515 SARS-CoV-2 and other lineage B betacoronaviruses. *Nat Microbiol*. 2020;5(4):562-9.
- 516 37. Miyakawa K, Jeremiah SS, Ohtake N, Matsunaga S, Yamaoka Y, Nishi M, et al. Rapid  
517 quantitative screening assay for SARS-CoV-2 neutralizing antibodies using HiBiT-tagged virus-  
518 like particles. *J Mol Cell Biol*. 2020.
- 519 38. Li Q, Wu J, Nie J, Zhang L, Hao H, Liu S, et al. The Impact of Mutations in SARS-CoV-  
520 2 Spike on Viral Infectivity and Antigenicity. *Cell*. 2020;182(5):1284-94.e9.
- 521 39. Korber B, Fischer WM, Gnanakaran S, Yoon H, Theiler J, Abfalterer W, et al. Tracking  
522 Changes in SARS-CoV-2 Spike: Evidence that D614G Increases Infectivity of the COVID-19  
523 Virus. *Cell*. 2020;182(4):812-27.e19.
- 524 40. Oguntuyo KY, Stevens CS, Hung CT, Ikegame S, Acklin JA, Kowdle SS, et al.  
525 Quantifying absolute neutralization titers against SARS-CoV-2 by a standardized virus  
526 neutralization assay allows for cross-cohort comparisons of COVID-19 sera. *medRxiv*. 2020.
- 527 41. Ou X, Liu Y, Lei X, Li P, Mi D, Ren L, et al. Characterization of spike glycoprotein of  
528 SARS-CoV-2 on virus entry and its immune cross-reactivity with SARS-CoV. *Nat Commun*.  
529 2020;11(1):1620.

- 530 42. Schmidt F, Weisblum Y, Muecksch F, Hoffmann HH, Michailidis E, Lorenzi JCC, et al.  
531 Measuring SARS-CoV-2 neutralizing antibody activity using pseudotyped and chimeric viruses.  
532 *J Exp Med.* 2020;217(11).
- 533 43. Zheng Y, Larragoite ET, Lama J, Cisneros I, Delgado JC, Slev P, et al. Neutralization  
534 Assay with SARS-CoV-1 and SARS-CoV-2 Spike Pseudotyped Murine Leukemia Virions.  
535 *bioRxiv.* 2020.
- 536 44. Zhou L, Huntington K, Zhang S, Carlsen L, So EY, Parker C, et al. Natural Killer cell  
537 activation, reduced ACE2, TMPRSS2, cytokines G-CSF, M-CSF and SARS-CoV-2-S  
538 pseudovirus infectivity by MEK inhibitor treatment of human cells. *bioRxiv.* 2020.
- 539 45. Naldini L, Blomer U, Gallay P, Ory D, Mulligan R, Gage FH, et al. In vivo gene delivery  
540 and stable transduction of nondividing cells by a lentiviral vector. *Science.* 1996;272(5259):263-  
541 7.
- 542 46. Zufferey R, Nagy D, Mandel RJ, Naldini L, Trono D. Multiply attenuated lentiviral  
543 vector achieves efficient gene delivery in vivo. *Nat Biotechnol.* 1997;15(9):871-5.
- 544 47. Bottcher E, Matrosovich T, Beyerle M, Klenk HD, Garten W, Matrosovich M.  
545 Proteolytic activation of influenza viruses by serine proteases TMPRSS2 and HAT from human  
546 airway epithelium. *J Virol.* 2006;80(19):9896-8.
- 547 48. Lee JM, Huddleston J, Doud MB, Hooper KA, Wu NC, Bedford T, et al. Deep  
548 mutational scanning of hemagglutinin helps predict evolutionary fates of human H3N2 influenza  
549 variants. *Proceedings of the National Academy of Sciences.* 2018;115(35):E8276-E85.
- 550 49. Ravichandran S, Coyle EM, Klenow L, Tang J, Grubbs G, Liu S, et al. Antibody  
551 signature induced by SARS-CoV-2 spike protein immunogens in rabbits. *Sci Transl Med.*  
552 2020;12(550).

- 553 50. Wang W, Anderson CM, De Feo CJ, Zhuang M, Yang H, Vassell R, et al. Cross-  
554 neutralizing antibodies to pandemic 2009 H1N1 and recent seasonal H1N1 influenza A strains  
555 influenced by a mutation in hemagglutinin subunit 2. *PLoS Pathog.* 2011;7(6):e1002081.
- 556 51. Wang W, Butler EN, Veguilla V, Vassell R, Thomas JT, Moos M, Jr., et al.  
557 Establishment of retroviral pseudotypes with influenza hemagglutinins from H1, H3, and H5  
558 subtypes for sensitive and specific detection of neutralizing antibodies. *J Virol Methods.*  
559 2008;153(2):111-9.
- 560 52. Xie X, Muruato A, Lokugamage KG, Narayanan K, Zhang X, Zou J, et al. An Infectious  
561 cDNA Clone of SARS-CoV-2. *Cell Host Microbe.* 2020;27(5):841-8 e3.
- 562 53. De Feo CJ, Wang W, Hsieh ML, Zhuang M, Vassell R, Weiss CD. Resistance to N-  
563 peptide fusion inhibitors correlates with thermodynamic stability of the gp41 six-helix bundle but  
564 not HIV entry kinetics. *Retrovirology.* 2014;11:86.
- 565 54. Wang W, Xie H, Ye Z, Vassell R, Weiss CD. Characterization of lentiviral pseudotypes  
566 with influenza H5N1 hemagglutinin and their performance in neutralization assays. *J Virol*  
567 *Methods.* 2010;165(2):305-10.
- 568 55. Shang J, Wan Y, Luo C, Ye G, Geng Q, Auerbach A, et al. Cell entry mechanisms of  
569 SARS-CoV-2. *Proceedings of the National Academy of Sciences.* 2020;117(21):11727-34.
- 570 56. Yurkovetskiy L, Wang X, Pascal KE, Tomkins-Tinch C, Nyalile T, Wang Y, et al.  
571 SARS-CoV-2 Spike protein variant D614G increases infectivity and retains sensitivity to  
572 antibodies that target the receptor binding domain. *bioRxiv : the preprint server for biology.*  
573 2020:2020.07.04.187757.
- 574 57. Plante JA, Liu Y, Liu J, Xia H, Johnson BA, Lokugamage KG, et al. Spike mutation  
575 D614G alters SARS-CoV-2 fitness. *Nature.* 2020.



- 576 58. Giroglou T, Cinatl J, Rabenau H, Drosten C, Schwalbe H, Doerr HW, et al. Retroviral  
577 Vectors Pseudotyped with Severe Acute Respiratory Syndrome Coronavirus S Protein. *Journal*  
578 *of Virology*. 2004;78(17):9007-15.
- 579 59. Chu H, Chan JF-W, Yuen TT-T, Shuai H, Yuan S, Wang Y, et al. Comparative tropism,  
580 replication kinetics, and cell damage profiling of SARS-CoV-2 and SARS-CoV with  
581 implications for clinical manifestations, transmissibility, and laboratory studies of COVID-19: an  
582 observational study. *The Lancet Microbe*. 2020;1(1):e14-e23.
- 583 60. Hoffmann M, Mösbauer K, Hofmann-Winkler H, Kaul A, Kleine-Weber H, Krüger N, et  
584 al. Chloroquine does not inhibit infection of human lung cells with SARS-CoV-2. *Nature*.  
585 2020;585(7826):588-90.
- 586 61. Hoffmann M, Kleine-Weber H, Schroeder S, Krüger N, Herrler T, Erichsen S, et al.  
587 SARS-CoV-2 Cell Entry Depends on ACE2 and TMPRSS2 and Is Blocked by a Clinically  
588 Proven Protease Inhibitor. *Cell*. 2020;181(2):271-80.e8.
- 589 62. Andrewes CH, Elford WJ. Observations on Anti-Phage Sera. I: "The Percentage Law".  
590 *Br J Exp Pathol*. 1933;14(6):367-76.
- 591 63. Salazar E, Kuchipudi SV, Christensen PA, Eagar T, Yi X, Zhao P, et al. Convalescent  
592 plasma anti-SARS-CoV-2 spike protein ectodomain and receptor-binding domain IgG correlate  
593 with virus neutralization. *The Journal of Clinical Investigation*. 2020;130(12).

## 594 **Figure legends**

### 595 **Figure 1. SARS-CoV-2 lentiviral pseudovirus infectivity under various conditions.**

596 (A) Relative infectivity of SARS-CoV-2 pseudoviruses in various target cells. The Y-axis shows  
597 relative infectivity compared to background in 293T cells. Subscript 't' or 's' refers to transient

598 or stable expression, respectively. Red line indicates background level ( $1 \times 10^4$  relative units of  
599 luciferase activity/ml). (B) Western blots probed for spike S1/S2 subunits and HIV p24  
600 incorporated into pseudoviruses. (C) Infectivity on 293T-ACE2<sub>s</sub> and 293T-ACE2.TMPRSS2<sub>s</sub> of  
601 pseudoviruses primed with or without TMPRSS2 during pseudovirus production. (D) Infectivity  
602 on 293T-ACE2<sub>s</sub> and 293T-ACE2.TMPRSS2<sub>s</sub> of pseudoviruses bearing full-length, wildtype S  
603 glycoprotein (WT), an S glycoprotein with the D614G substitution, or S glycoproteins with C-  
604 terminal truncations of 14 (TR14) and 19 (TR19) amino acids. Data are shown as means and  
605 standard deviations from 3-4 independent experiments (panel A, C and D). The tests for two-  
606 group comparison were analyzed using GraphPad Prism software. P values of 0.05 were  
607 considered statistically significant. \*\*:  $P < 0.0001$ , compared to the infectivity in 293T.

608 **Figure 2. Infection of Vero E6, 293T-ACE2<sub>s</sub> and 293T-ACE2.TMPRSS2<sub>s</sub> with replicating**  
609 **SARS-CoV-2-mNG virus.** Cells inoculated with 100 PFU/ml of virus were fixed and imaged at  
610 24 hours post infection by confocal microscopy. The left column shows bright field images  
611 (black and white), with the 293-ACE2.TMPRSS2 cells (bottom) showing a high degree of  
612 cytopathic effect and syncytium formation, resulting in fewer cells. The center column shows  
613 merged images of TMPRSS2/mCherry and Hoechst dye (blue) with only the 293-  
614 ACE2.TMPRSS2 cells (bottom) showing positive signals in red. The right column shows merged  
615 images of SARS-CoV-2/mNG (green), TMPRSS2/mCherry (red), and Hoechst dye (blue).  
616 Compared to Vero (top) and 293-ACE2 (middle), the 293T-ACE2.TMPRSS2 (bottom) cells  
617 show stronger SARS-CoV-2 nNG signals in green. Scale indicates 50um.

618 **Figure 3. pH-dependent and -independent pathways of cell entry of SARS-CoV-2 S**  
619 **pseudoviruses.** Camostat mesylate inhibits TMPRSS2 activity and chloroquine inhibits  
620 endosomal acidification required for cathepsin activity. Cells were pretreated with camostat

621 mesylate or chloroquine for 2 h prior to pseudovirus infection in the presence of inhibitor for a  
622 period of 48 h. Results shown are representative of three independent experiments.

623 **Figure 4. Optimization of pseudovirus inoculum for neutralization assays.** Neutralizations  
624 were performed in 293T-ACE2.TMPRSS2<sub>s</sub> cells with mAb 10G6H5 (A and C) and a rabbit  
625 serum against the S1 subunit (B and D) using various pseudovirus inoculums.

626 **Figure 5. ACE2 and TMPRSS2 levels at the cell surface.** (A) Cell surface expression of ACE2  
627 and TMPRSS2 on various cell types. (B) Mean fluorescence intensity (MFI) of ACE2 on various  
628 cell types compared to 293T cells (C) Mean fluorescence intensity (MFI) of TMPRSS2 on  
629 various cell types compared to 293T cells

630 **Figure 6. Neutralization titers of serum panels.** ID<sub>50</sub> (A) and ID<sub>80</sub> (B) titers. ID<sub>50</sub> = inhibitory  
631 dilution leading to 50% neutralization compared to control. ID<sub>80</sub> = inhibitory dilution leading to  
632 80% neutralization compared to control.

633 **Figure 7. Correlation of neutralization titers between different neutralization assays.**  
634 Spearman correlation of ID<sub>50</sub> (A and C) or ID<sub>80</sub> (B and D) values comparing titers generated in  
635 the present study to (A and B) the focused concordance samples and (C and D) an NIBSC  
636 reference standards with reported titers generated by a plaque reduction neutralization (PRNT)  
637 assay.

638

639

640

641

642

643

644

645

646

647

# Figure 1

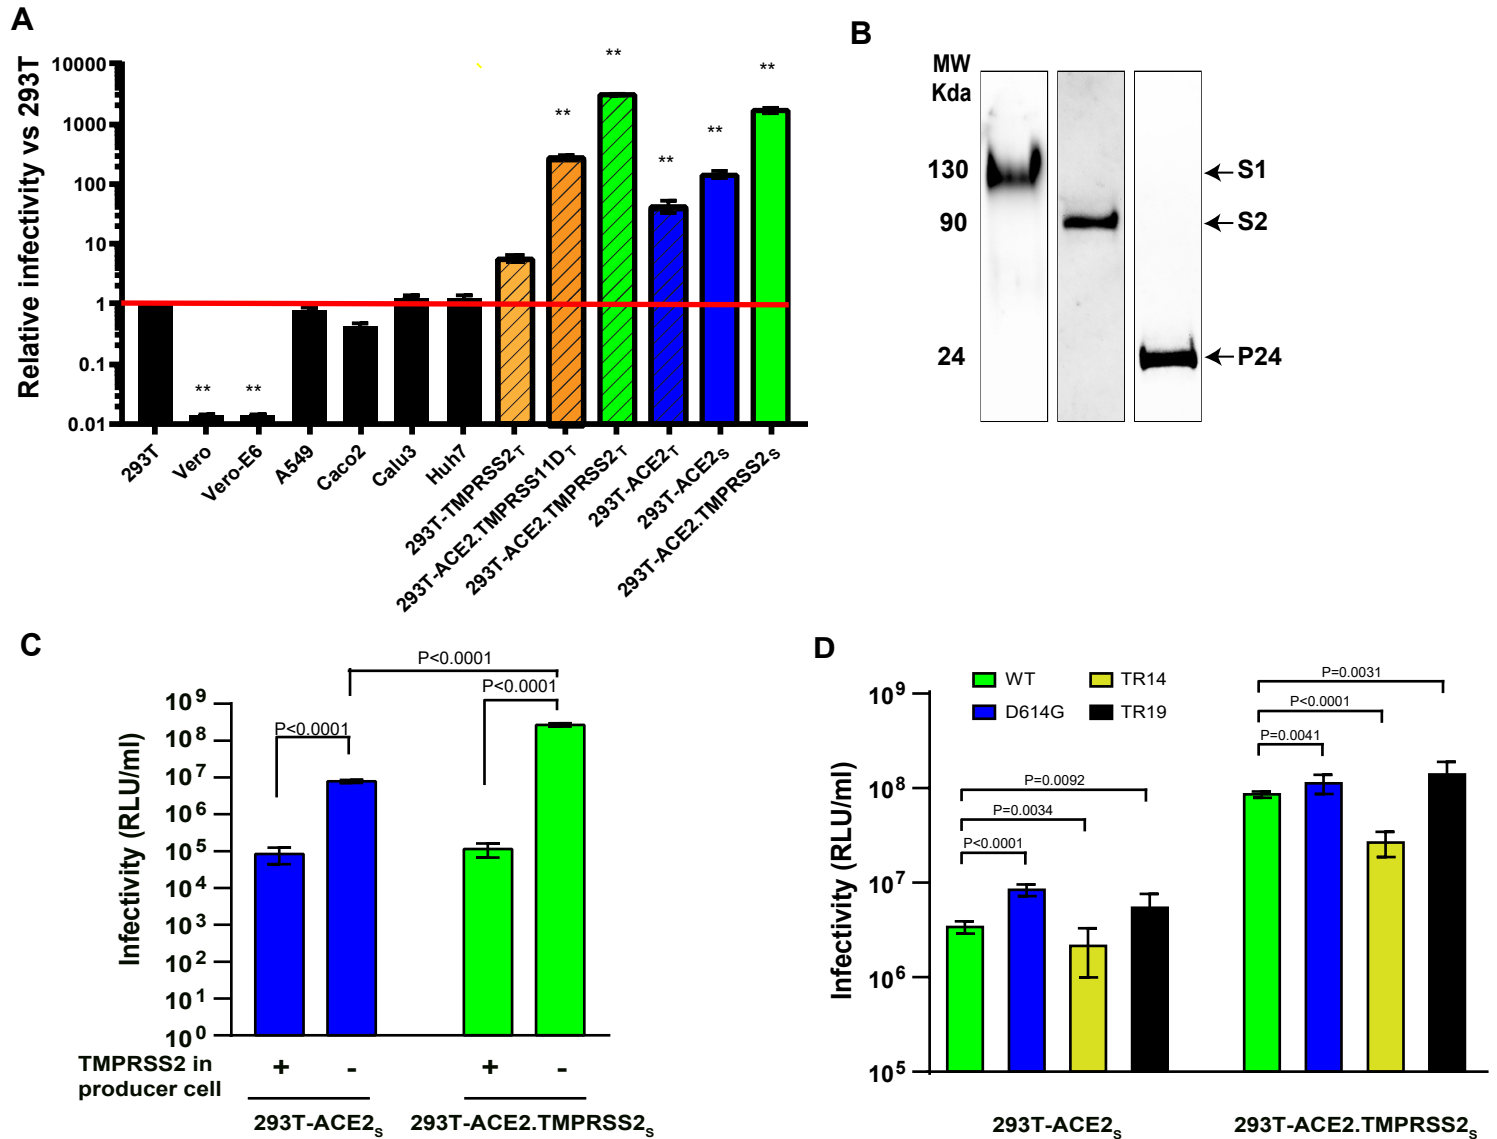

## Figure 2

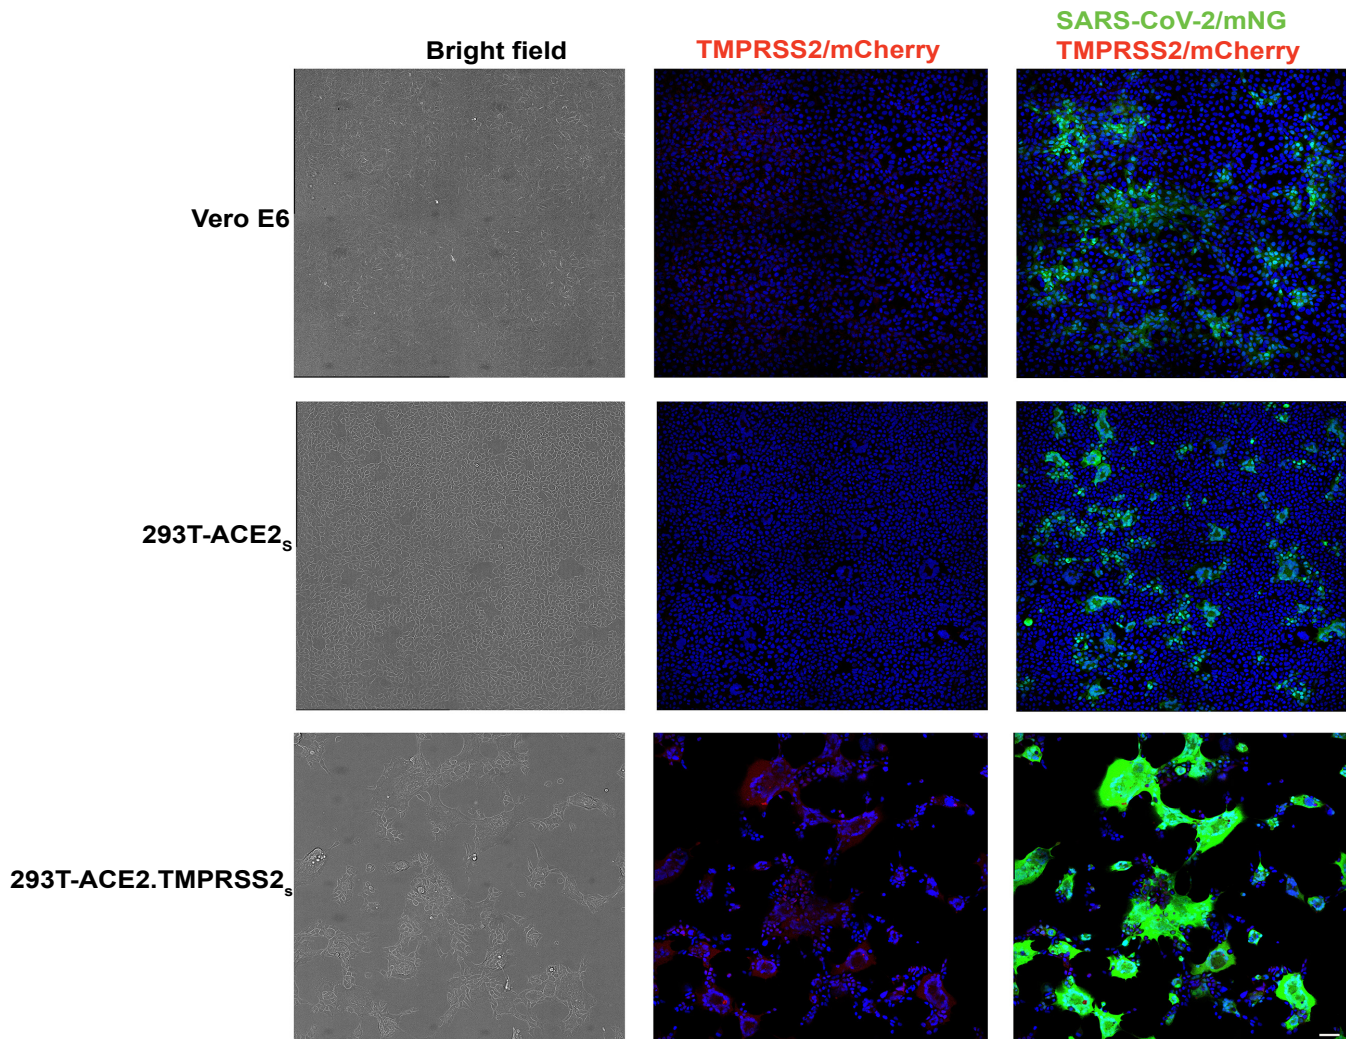

**Figure 3**

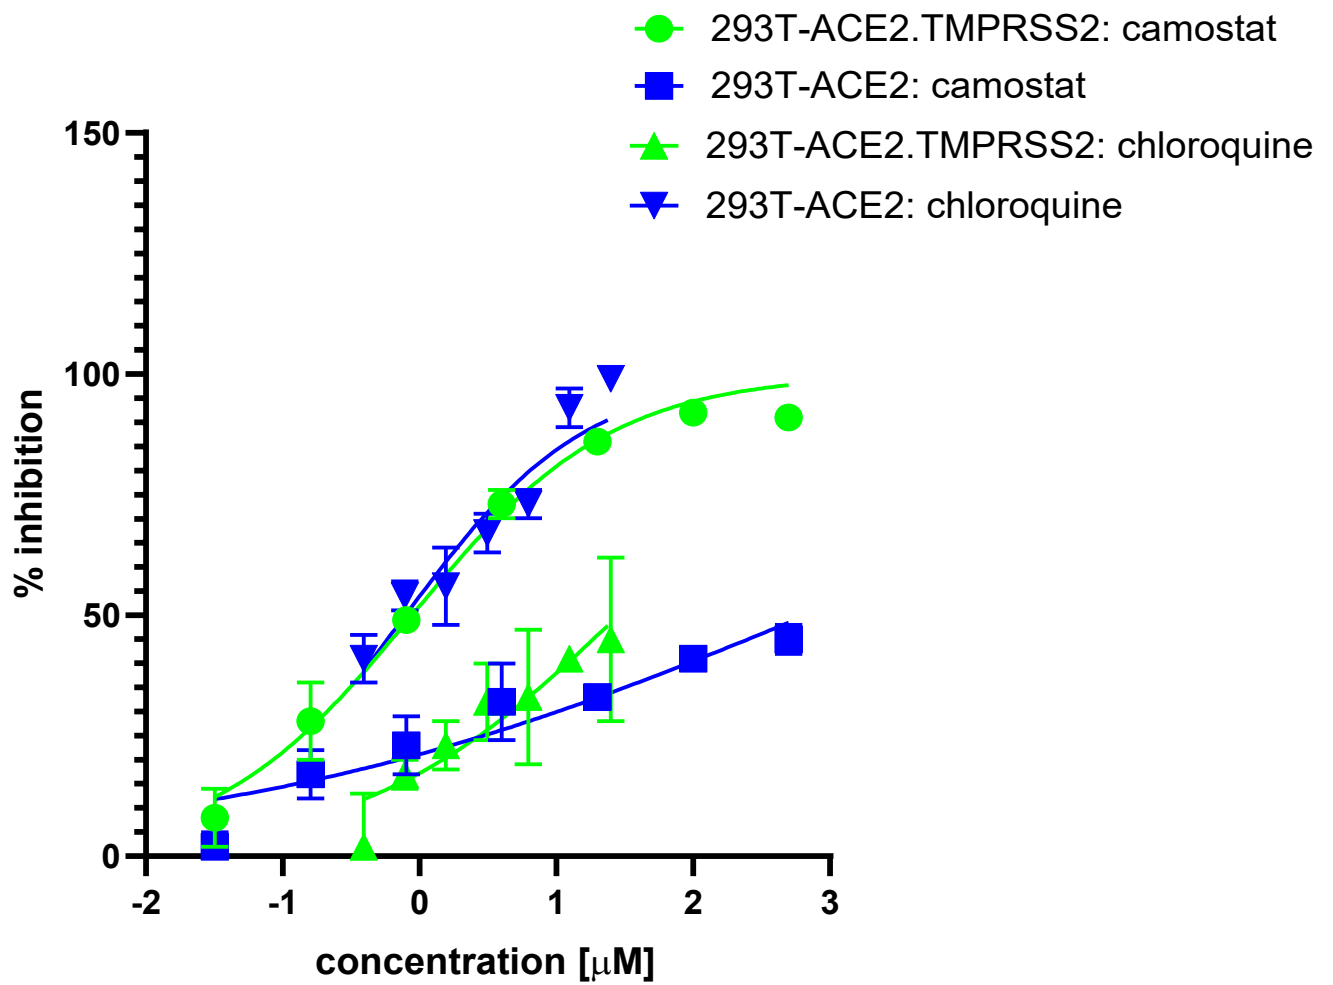

## Figure 4

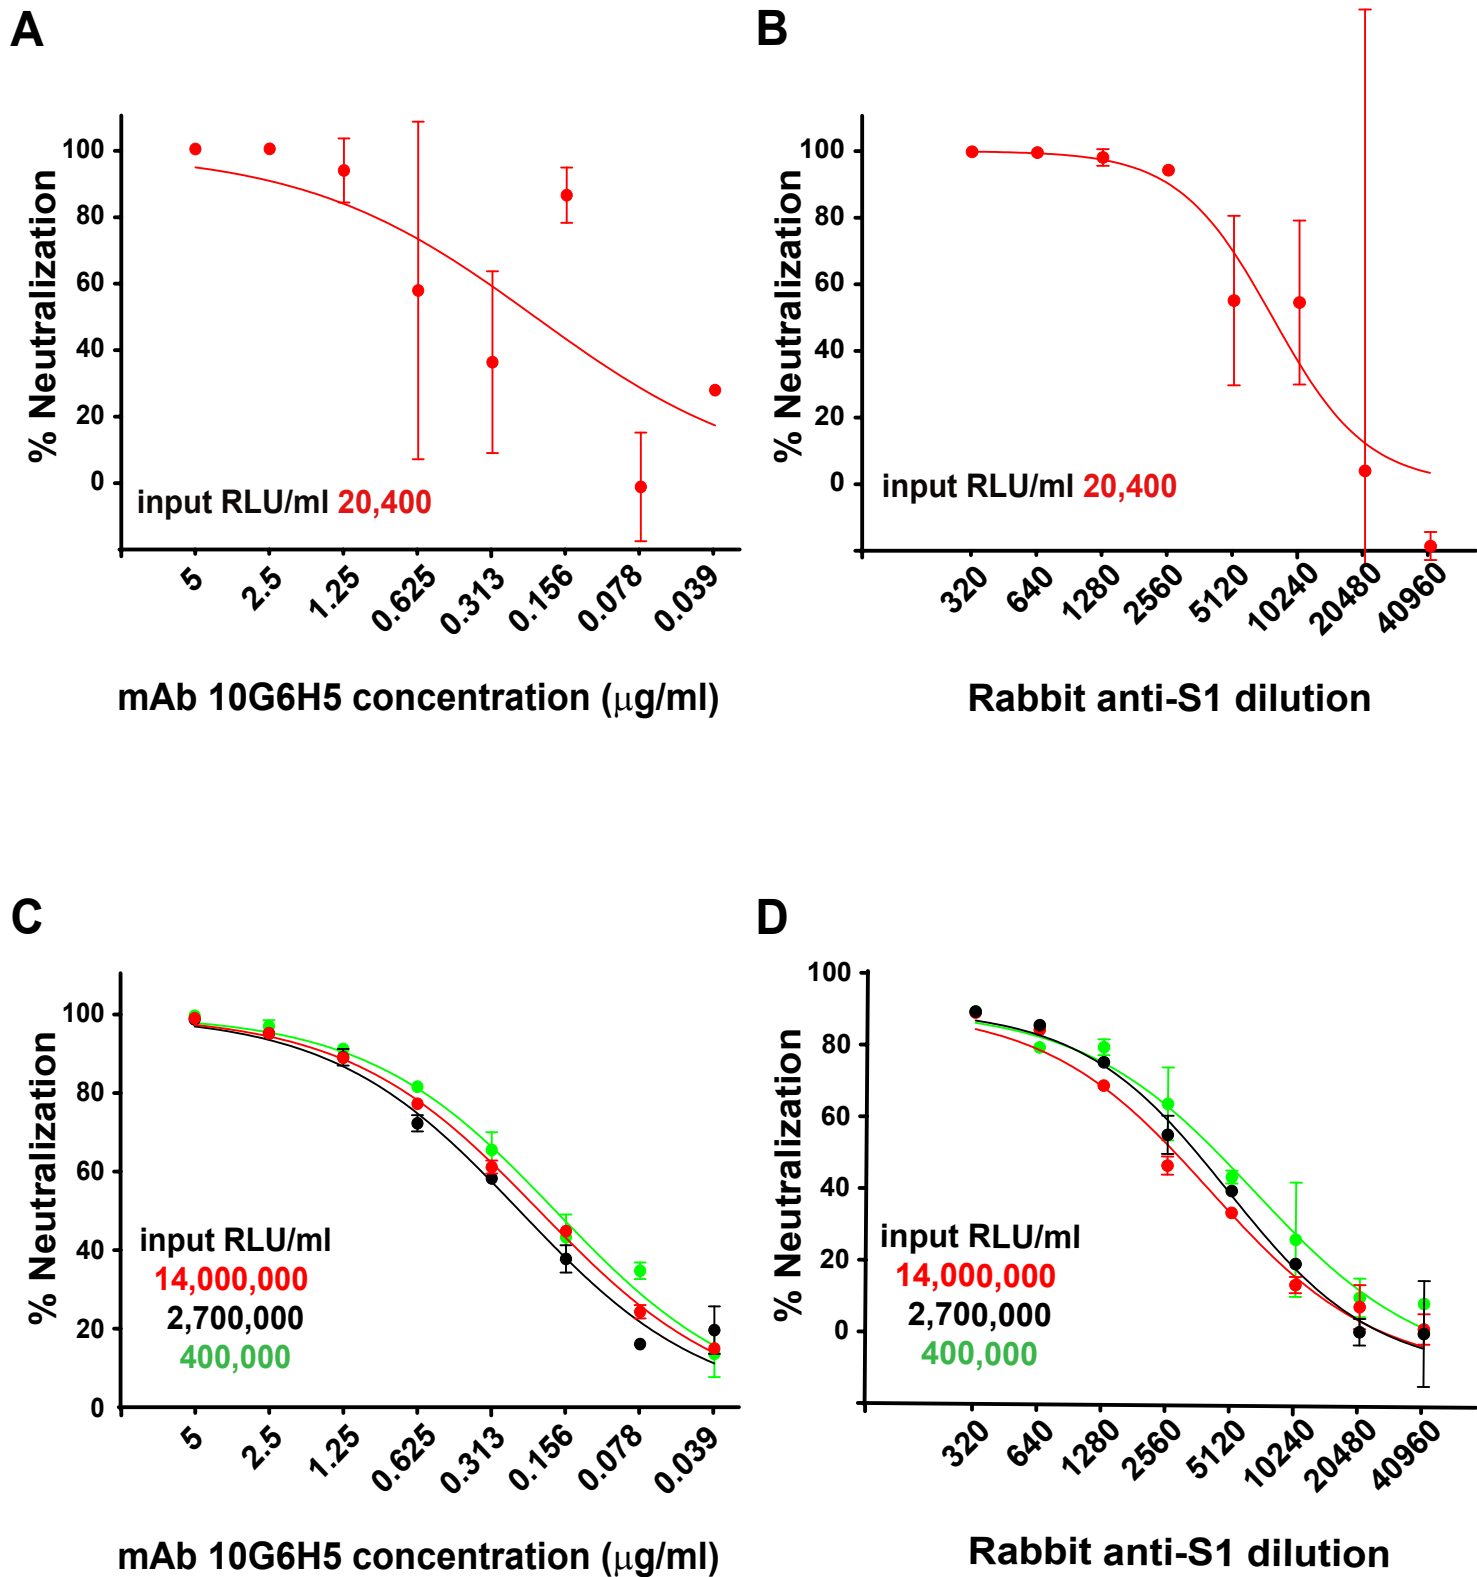



**Figure 5**

**A**

bioRxiv preprint doi: <https://doi.org/10.1101/2020.12.26.424442>; this version posted December 26, 2020. The copyright holder for this preprint (which was not certified by peer review) is the author/funder, who has granted bioRxiv a license to display the preprint in perpetuity. It is made available under a [CC-BY-NC-ND 4.0 International license](https://creativecommons.org/licenses/by-nc-nd/4.0/).

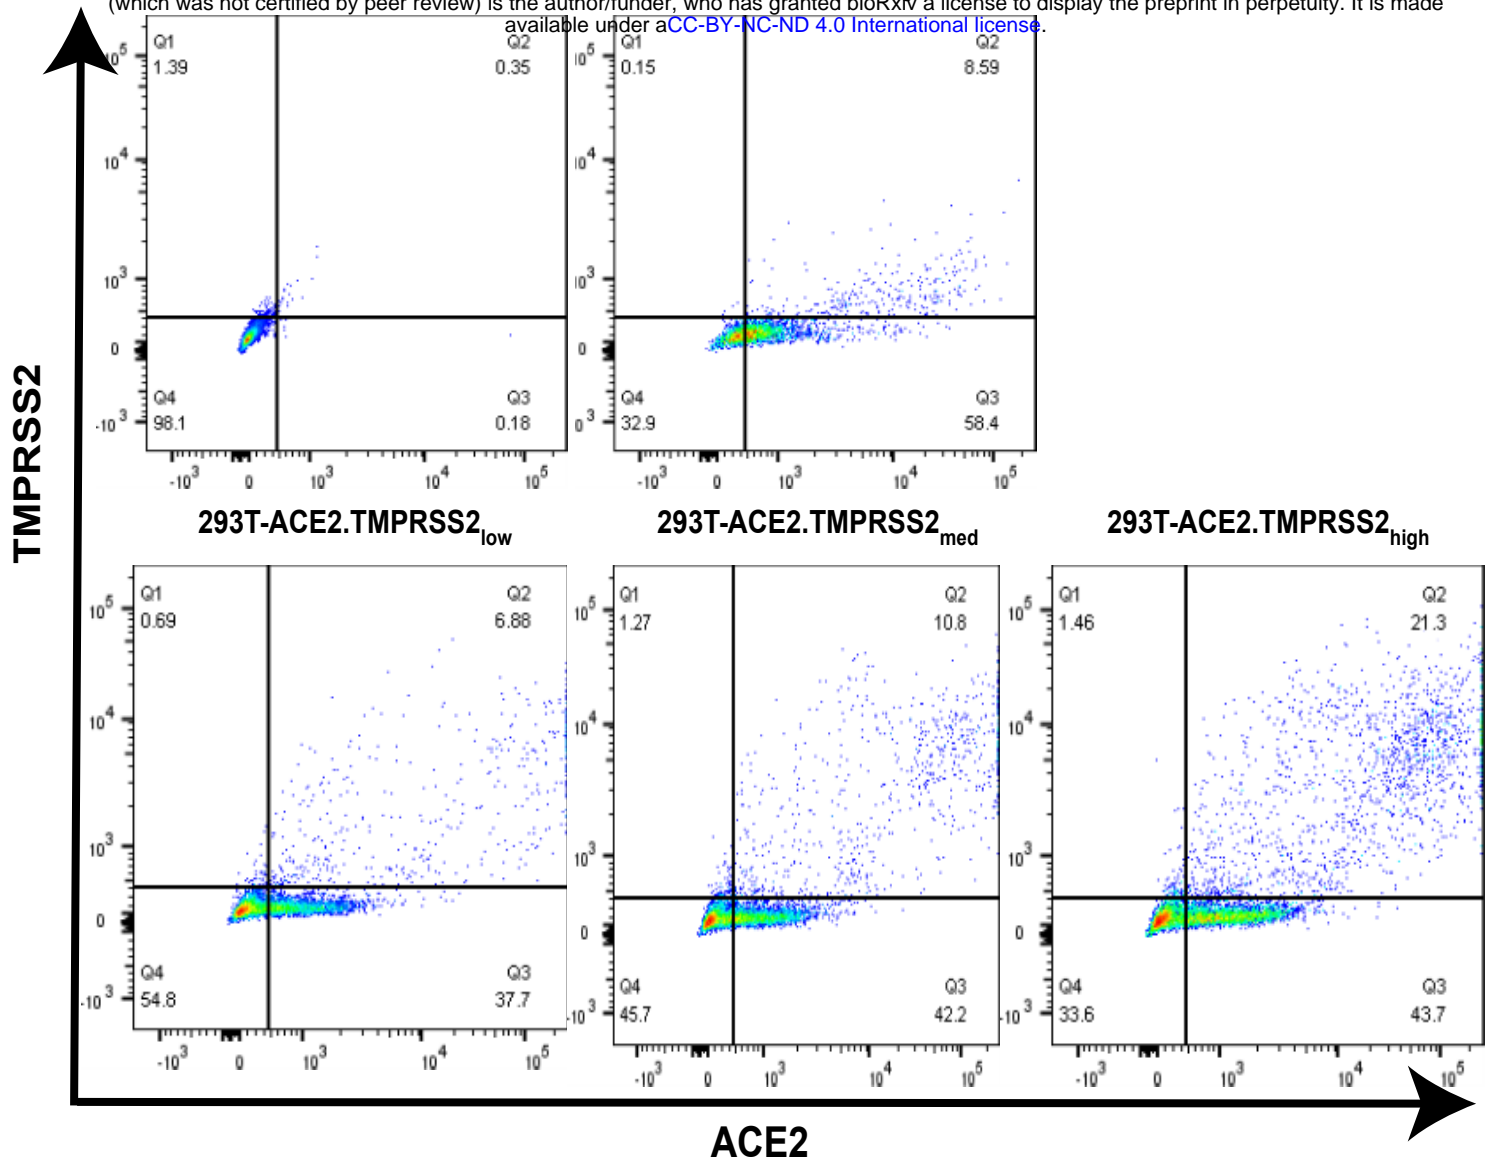

**B**

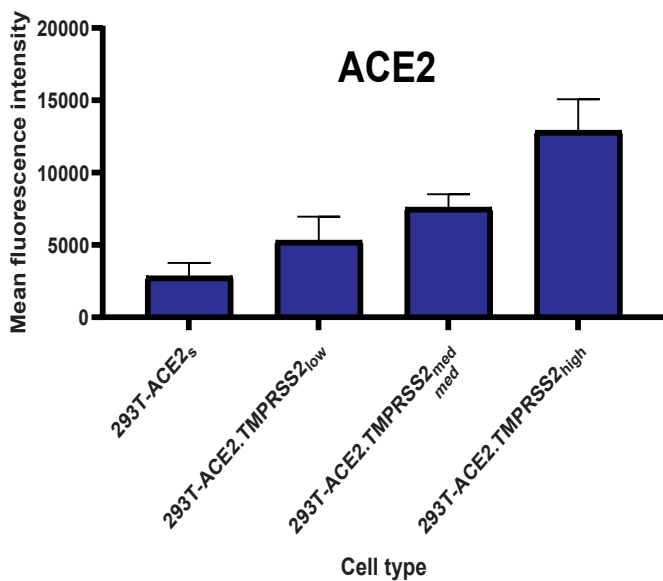

**C**

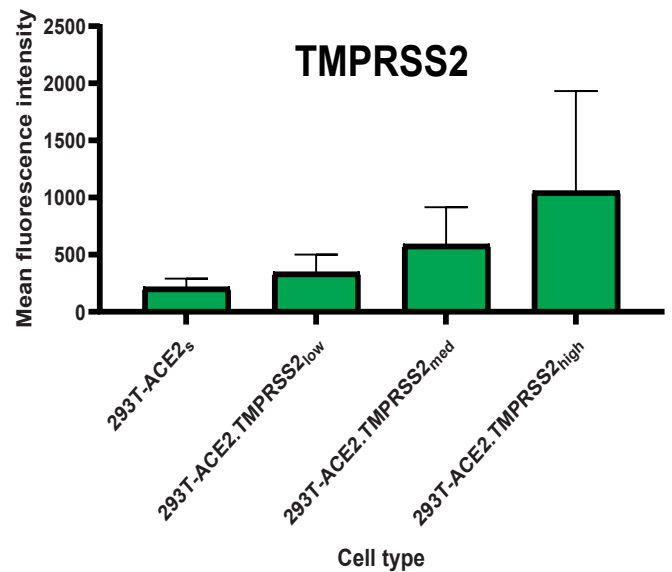

**Figure 6**

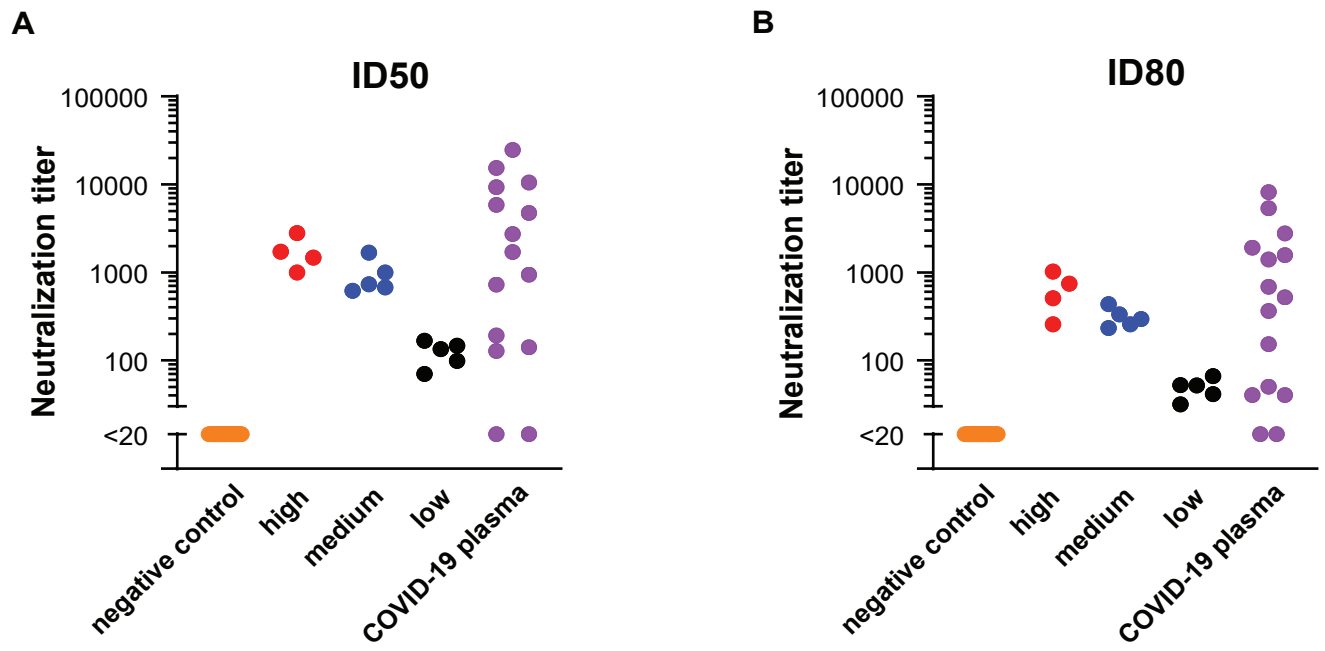

## Figure 7

**A**

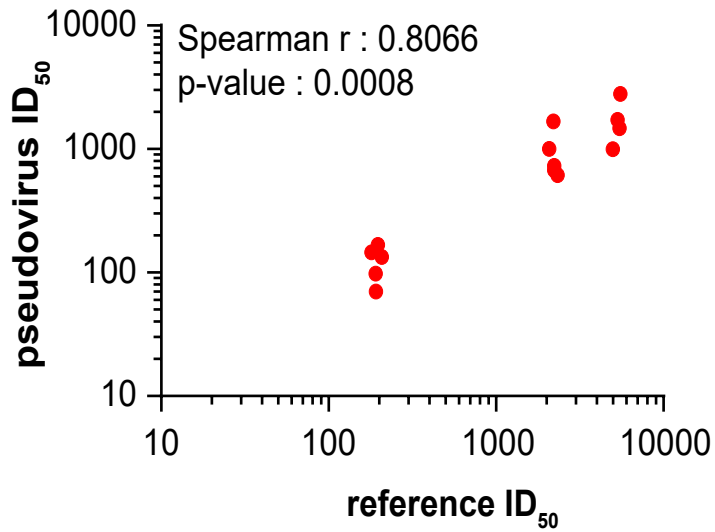

**B**

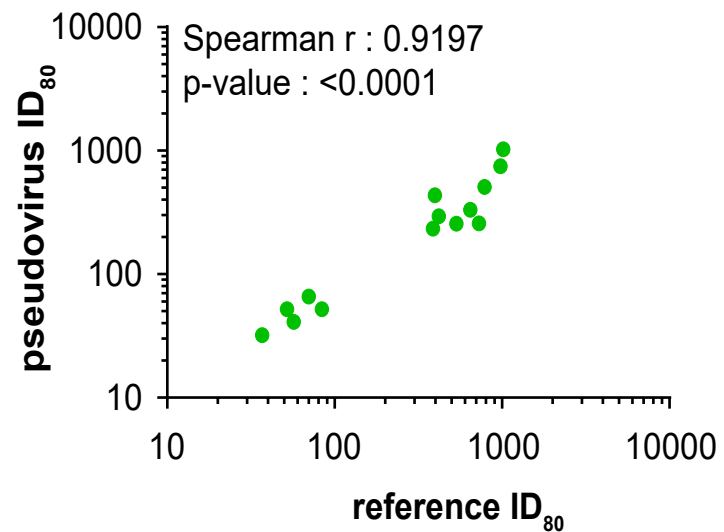

**C**

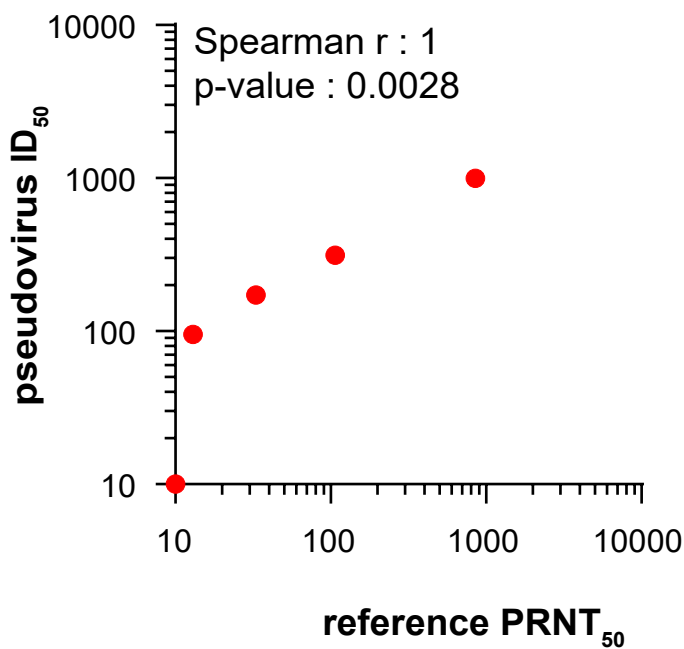

**D**

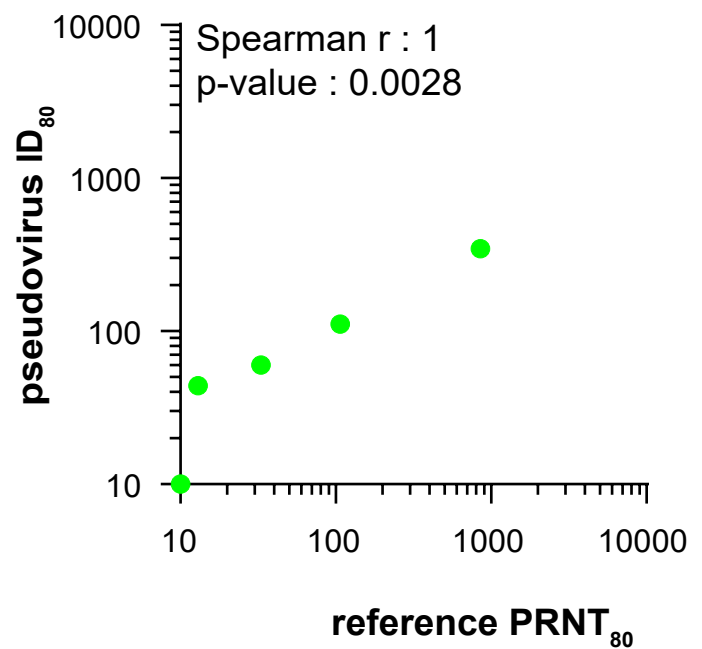

Source: http://biorxiv.org/content/10.1101/2020.12.26.424442v1.full.pdf
